# Supplementary material for: The effectiveness of SGLT2 inhibitor in the incidence of atrial fibrillation/atrial flutter in patients with type 2 diabetes mellitus/heart failure: a systematic review and meta-analysis
Source: PubMed Central journal article supplement — J Thorac Dis. 2022 May;14(5):1620–37. doi: 10.21037/jtd-22-550 (PMC9186250; doi:10.21037/jtd-22-550), 2022-05
Supplement: jtd-14-05-1620-supplementary.pdf [file jtd-14-05-1620-supplementary.pdf]

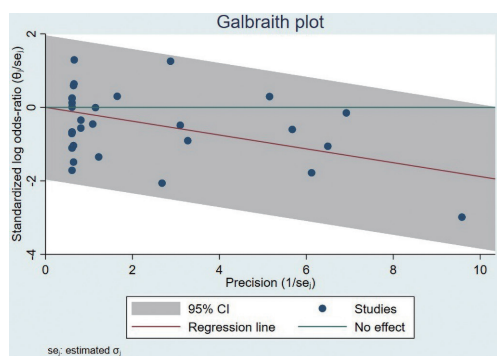

**Figure S1** Galbraith plot of AF/AFL, incidence of supraventricular or ventricular tachycardia. CI, confidence interval.

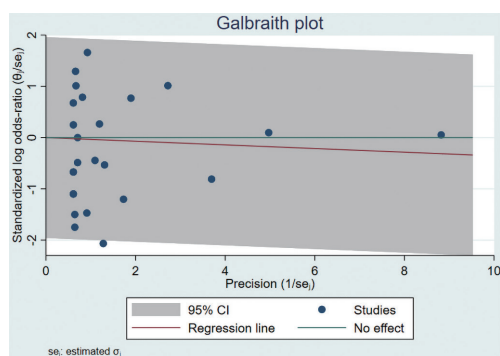

**Figure S2** supplement Galbraith plot of cerebral infarction, intracardiac thrombosis and arterial thrombosis. CI, confidence interval.
